# Supplementary material for: Comparative Analysis of Microcystin Prevalence in Michigan Lakes by Online Concentration LC/MS/MS and ELISA
Source: MDPI journal article supplement (doi:10.3390/toxins11010013), 2019-01-01
Supplement: s1 [file s1]

## Supplementary Materials: Comparative Analysis of Microcystin Prevalence in Michigan Lakes by Online Concentration LC/MS/MS and ELISA

Johnna A. Birbeck <sup>1,\*</sup>, Judy A. Westrick <sup>1,\*</sup>, Grace M. O'Neill <sup>1</sup>, Brian Spies <sup>2</sup> and David C. Szlag <sup>2</sup>

Table S1. Lake Site Identification and Characterization.

| Site Number | Lake Name         | Site Code | County     | Hydraulics Open/Closed | Level III Ecoregion                             |
|-------------|-------------------|-----------|------------|------------------------|-------------------------------------------------|
| 1           | Bear Lake         | BEA       | Kalkaska   | Closed                 | Northern Lakes and Forests                      |
| 2           | Belleville Lake   | BEL       | Wayne      | Open                   | Huron/Erie Lake Plains                          |
| 3           | Bogie Lake        | BOG       | Oakland    | Closed                 | Southern Michigan/Northern Indiana Drift Plains |
| 4           | Brighton Lake     | BRI       | Livingston | Open                   | Southern Michigan/Northern Indiana Drift Plains |
| 5           | Lake Cadillac     | CAD       | Wexford    | Open                   | Northern Lakes and Forests                      |
| 6           | Coldwater Lake    | COL       | Isabella   | Open                   | Northern Lakes and Forests                      |
| 7           | Deer Lake         | DEE       | Charlevoix | Closed                 | North Central Hardwood Forests                  |
| 8           | Lake Erie         | ERI       | Monroe     | Open                   | Great Lake System                               |
| 9           | Ford Lake         | FOR       | Washtenaw  | Open                   | Huron/Erie Lake Plains                          |
| 10          | Houghton Lake     | HOU       | Roscommon  | Open                   | Northern Lakes and Forests                      |
| 11          | Hudson Lake       | HUD       | Lenawee    | Open                   | Eastern Corn Belt Plains                        |
| 12          | Intermediate lake | INT       | Antrim     | Open                   | North Central Hardwood Forests                  |
| 13          | Little Glen Lake  | LGL       | Leelanac   | Open                   | North Central Hardwood Forests                  |
| 14          | Lime Lake         | LIM       | Hillsdale  | Open                   | Eastern Corn Belt Plains                        |
| 15          | Little Round Lake | LRO       | Lenawee    | Closed                 | Eastern Corn Belt Plains                        |
| 16          | Manitou Lake      | MAN       | Shiawassee | Open                   | Southern Michigan/Northern Indiana Drift Plains |
| 17          | Lake Margrethe    | MAR       | Crawford   | Open                   | Northern Lakes and Forests                      |
| 18          | Lake Nepessing    | NEP       | Lapeer     | Closed                 | Southern Michigan/Northern Indiana Drift Plains |
| 19          | Ore Lake          | ORE       | Livingston | Open                   | Southern Michigan/Northern Indiana Drift Plains |
| 20          | Paradise Lake     | PAR       | Emmett     | Open                   | Northern Lakes and Forests                      |
| 21          | Platte Lake       | PLA       | Benzie     | Open                   | North Central Hardwood Forests                  |
| 22          | Pontiac Lake      | PON       | Oakland    | Open                   | Southern Michigan/Northern Indiana Drift Plains |
| 23          | Posey Lake        | POS       | Lenawee    | Open                   | Eastern Corn Belt Plains                        |
| 24          | Round Lake        | ROU       | Lenawee    | Open                   | Southern Michigan/Northern Indiana Drift Plains |

|    |                  |     |                |        |                                                 |
|----|------------------|-----|----------------|--------|-------------------------------------------------|
| 25 | Sanford Lake     | SAN | Midland        | Open   | Huron/Erie Lake Plains                          |
| 26 | Silver Lake      | SIL | Grand Traverse | Closed | North Central Hardwood Forests                  |
| 27 | Lake St. Claire  | STC | Macomb         | Open   | Great Lake System                               |
| 28 | Stony Creek Lake | STO | Oakland        | Open   | Southern Michigan/Northern Indiana Drift Plains |
| 29 | Lake Superior    | SUP | Chippewa       | Open   | Great Lake System                               |
| 30 | Wixom Lake       | WIX | Gladwin        | Open   | Northern Lakes and Forests                      |
| 31 | West Twin Lake   | WTL | Montmorency    | Open   | Northern Lakes and Forests                      |

Table S2. LC/MS/MS method validation.

| Analyte                | D-Asp3-RR | RR     | Nodularin | YR     | HtyR   | LR     | D-Asp3-LR | HilR   | WR     | LA     | LY     | LW     | LF     |
|------------------------|-----------|--------|-----------|--------|--------|--------|-----------|--------|--------|--------|--------|--------|--------|
| 1                      | 5.448     | 5.453  | 10.016    | 9.633  | 8.558  | 9.101  | 5.627     | 9.522  | 4.749  | 10.322 | 11.539 | 9.215  | 5.939  |
| 2                      | 5.683     | 5.289  | 9.415     | 10.98  | 9.887  | 10.128 | 4.514     | 11.168 | 5.722  | 11.078 | 11.07  | 9.051  | 5.422  |
| 3                      | 5.695     | 5.081  | 9.257     | 9.574  | 8.81   | 8.206  | 5.318     | 9.655  | 5.418  | 10.998 | 10.84  | 10.618 | 5.416  |
| 4                      | 5.383     | 5.161  | 9.547     | 11.781 | 9.823  | 10.771 | 5.122     | 11.066 | 5.726  | 9.917  | 10.206 | 10.477 | 5.901  |
| 5                      | 5.394     | 5.314  | 9.445     | 11.769 | 8.564  | 8.335  | 5.24      | 11.509 | 5.831  | 9.75   | 10.535 | 10.496 | 5.243  |
| 6                      | 5.372     | 5.4    | 9.361     | 10.912 | 9.362  | 9.255  | 5.431     | 10.793 |        | 9.848  | 11.901 | 11.537 | 5.728  |
| 7                      | 5.662     | 5.515  | 9.578     | 11.731 | 8.025  | 8.068  | 5.953     | 9.353  |        | 8.485  | 12.052 | 10.682 | 6.066  |
| Mean                   | 5.52      | 5.32   | 9.52      | 10.91  | 9.00   | 9.12   | 5.32      | 10.44  | 5.49   | 10.06  | 11.16  | 10.30  | 5.67   |
| Std Dev                | 0.15      | 0.16   | 0.25      | 0.97   | 0.70   | 1.03   | 0.45      | 0.90   | 0.44   | 0.88   | 0.70   | 0.87   | 0.31   |
| HRpir                  | 0.60      | 0.62   | 0.97      | 3.83   | 2.79   | 4.07   | 1.77      | 3.56   | 1.75   | 3.48   | 2.75   | 3.46   | 1.25   |
| DL                     | 0.56      | 0.58   | 0.91      | 3.58   | 2.61   | 3.80   | 1.66      | 3.33   | 2.03   | 3.26   | 2.58   | 3.24   | 1.17   |
| Upper PIR              | 122.46    | 118.66 | 104.89    | 147.37 | 117.91 | 131.90 | 141.78    | 139.94 | 144.79 | 135.37 | 139.18 | 137.61 | 138.41 |
| Lower PIR              | 98.32     | 93.98  | 85.45     | 70.86  | 62.17  | 50.57  | 70.82     | 68.82  | 74.78  | 65.77  | 84.08  | 68.33  | 88.53  |
| % RSD (IDP)            | 2.76%     | 2.93%  | 2.58%     | 8.85%  | 7.81%  | 11.25% | 8.42%     | 8.60%  | 8.04%  | 8.73%  | 6.23%  | 8.49%  | 5.55%  |
| %Recovery (IDA)        | 110%      | 106%   | 95%       | 109%   | 90%    | 91%    | 106%      | 104%   | 110%   | 101%   | 112%   | 103%   | 113%   |
| student <i>t</i> value | 3.707     | 3.707  | 3.707     | 3.707  | 3.707  | 3.707  | 3.707     | 3.707  | 4.604  | 3.707  | 3.707  | 3.707  | 3.707  |
| <i>r</i> <sup>2</sup>  | 0.9994    | 0.9998 | 0.9999    | 0.998  | 0.9996 | 0.9988 | 0.9996    | 0.9987 | 0.9991 | 0.9981 | 0.9986 | 0.9994 | 0.9993 |
| Range (ppt)            | 5-500     | 5-500  | 5-500     | 5-500  | 5-500  | 5-500  | 0.5-500   | 1-500  | 5-500  | 5-500  | 1-500  | 5-500  | 1-500  |

Table S3. July 2017 LC/MS/MS data.

|             |         | July 2017       |              |             |               |             |                 |               |             |             |             |             |             |
|-------------|---------|-----------------|--------------|-------------|---------------|-------------|-----------------|---------------|-------------|-------------|-------------|-------------|-------------|
| Sample Name | Site ID | D-Asp3-RR (ppt) | MC- RR (ppt) | MC-YR (ppt) | MC-HtyR (ppt) | MC-LR (ppt) | D-Asp3-LR (ppt) | MC-HilR (ppt) | MC-WR (ppt) | MC-LA (ppt) | MC-LY (ppt) | MC-LW (ppt) | MC-LF (ppt) |
| BEA         | 1       | ND              | BDL          | BDL         | ND            | ND          | ND              | ND            | ND          | 15.63       | ND          | ND          | ND          |
| BEL         | 2       | ND              | 36.49        | BDL         | BDL           | ND          | 58.60           | ND            | ND          | 12.45       | ND          | ND          | ND          |
| BOG         | 3       | 32.36           | 10.96        | BDL         | ND            | ND          | BDL             | ND            | ND          | 18.26       | ND          | ND          | ND          |
| BRI         | 4       | 46.19           | 163.58       | 7.42        | BDL           | 43.38       | 195.39          | 5.00          | ND          | 7.65        | ND          | ND          | ND          |
| CAD         | 5       | 75.65           | 405.12       | 7.49        | 9.39          | 35.28       | ND              | ND            | ND          | 28.89       | ND          | ND          | ND          |
| COL         | 6       | ND              | ND           | ND          | BDL           | ND          | ND              | ND            | ND          | 5.24        | ND          | ND          | ND          |
| DEE         | 7       | ND              | ND           | ND          | BDL           | 392.10      | 534.95          | ND            | ND          | 160.27      | ND          | ND          | ND          |
| ERI         | 8       | ND              | ND           | ND          | ND            | ND          | ND              | ND            | ND          | 47.29       | ND          | ND          | ND          |
| FOR         | 9       | ND              | ND           | ND          | BDL           | ND          | ND              | ND            | ND          | 24.31       | ND          | ND          | ND          |
| HOU         | 10      | ND              | ND           | ND          | ND            | 9.08        | ND              | ND            | ND          | 137.52      | ND          | ND          | ND          |
| HUD         | 11      | ND              | 47.49        | BDL         | BDL           | ND          | ND              | ND            | ND          | 19.21       | BDL         | ND          | ND          |
| INT         | 12      | ND              | ND           | ND          | BDL           | ND          | ND              | ND            | ND          | 32.05       | ND          | ND          | ND          |
| LGL         | 13      | ND              | 17.75        | BDL         | BDL           | BDL         | ND              | ND            | ND          | 105.70      | ND          | ND          | ND          |
| LIM         | 14      | ND              | ND           | BDL         | BDL           | ND          | ND              | ND            | ND          | 32.59       | ND          | ND          | ND          |
| LRO         | 15      | ND              | ND           | BDL         | BDL           | ND          | ND              | ND            | ND          | 146.48      | ND          | ND          | ND          |
| MAN         | 16      | ND              | 14.73        | ND          | ND            | ND          | ND              | ND            | ND          | 11.60       | ND          | ND          | ND          |
| MAR         | 17      | ND              | ND           | ND          | BDL           | 24.35       | 32.29           | ND            | ND          | 144.14      | ND          | ND          | ND          |
| NEP         | 18      | ND              | ND           | BDL         | ND            | ND          | ND              | ND            | ND          | 37.64       | ND          | ND          | ND          |
| OER         | 19      | ND              | 16.50        | ND          | ND            | ND          | ND              | ND            | ND          | ND          | ND          | ND          | ND          |
| PAR         | 20      | ND              | 18.21        | ND          | BDL           | ND          | ND              | ND            | ND          | ND          | ND          | ND          | ND          |
| PLA         | 21      | ND              | ND           | BDL         | ND            | ND          | ND              | ND            | ND          | 14.76       | ND          | ND          | ND          |
| PON         | 22      | 68.25           | 385.20       | 7.85        | BDL           | 344.66      | 307.81          | 10.01         | ND          | 365.72      | ND          | ND          | ND          |
| POS         | 23      | ND              | ND           | BDL         | ND            | ND          | ND              | ND            | ND          | 5.91        | ND          | ND          | ND          |
| ROU         | 24      | ND              | ND           | BDL         | ND            | ND          | ND              | ND            | ND          | ND          | ND          | ND          | ND          |
| SAN         | 25      | ND              | ND           | BDL         | BDL           | ND          | ND              | ND            | ND          | 45.35       | ND          | ND          | ND          |
| SIL         | 26      | ND              | 8.51         | ND          | ND            | ND          | ND              | ND            | ND          | 57.50       | ND          | ND          | ND          |
| STC         | 27      | 144.81          | 126.58       | BDL         | BDL           | ND          | ND              | ND            | ND          | 17.66       | 5.19        | BDL         | ND          |
| STO         | 28      | ND              | 24.41        | BDL         | ND            | ND          | 25.41           | ND            | ND          | 15.31       | ND          | ND          | ND          |
| SUP         | 29      | ND              | 8.19         | ND          | ND            | ND          | ND              | ND            | ND          | 11.40       | ND          | ND          | ND          |
| WIX         | 30      | ND              | ND           | BDL         | 5.29          | ND          | ND              | ND            | ND          | 20.04       | ND          | ND          | ND          |
| WTL         | 31      | ND              | ND           | ND          | ND            | ND          | ND              | ND            | ND          | ND          | ND          | ND          | ND          |

\* BDL = Below Detection Limit; \* ND = Not Detected.

Table S4. August 2017 LC/MS/MS data.

| August 2017 |         |                  |              |             |               |             |                 |               |             |             |             |             |             |
|-------------|---------|------------------|--------------|-------------|---------------|-------------|-----------------|---------------|-------------|-------------|-------------|-------------|-------------|
| Sample Name | Site ID | D-Asp3- RR (ppt) | MC- RR (ppt) | MC-YR (ppt) | MC-HtyR (ppt) | MC-LR (ppt) | D-Asp3-LR (ppt) | MC-HilR (ppt) | MC-WR (ppt) | MC-LA (ppt) | MC-LY (ppt) | MC-LW (ppt) | MC-LF (ppt) |
| BEA         | 1       | ND               | ND           | ND          | ND            | 7.61        | ND              | ND            | ND          | ND          | ND          | ND          | ND          |
| BEL         | 2       | ND               | 30.75        | ND          | ND            | 28.77       | ND              | ND            | ND          | 11.78       | ND          | ND          | ND          |
| BOG         | 3       | ND               | ND           | ND          | ND            | 11.03       | ND              | ND            | ND          | ND          | ND          | ND          | ND          |
| BRI         | 4       | 255.12           | 8551.74      | 1798.53     | 106.68        | 2763.96     | 902.25          | 149.96        | 302.21      | 11.13       | ND          | 10.10       | 5.24        |
| CAD         | 5       | 62.92            | 1244.86      | 133.92      | 61.46         | 337.41      | ND              | 29.69         | 26.50       | 49.06       | ND          | ND          | ND          |
| COL         | 6       | ND               | ND           | ND          | ND            | 54.65       | ND              | ND            | ND          | 21.53       | ND          | ND          | ND          |
| DEE         | 7       | ND               | 4.82         | ND          | ND            | 679.49      | 29.58           | ND            | ND          | 369.87      | ND          | ND          | ND          |
| ERI         | 8       | ND               | 6.96         | ND          | ND            | 15.82       | ND              | ND            | ND          | ND          | ND          | ND          | ND          |
| FOR         | 9       | ND               | 21.88        | ND          | ND            | 129.05      | ND              | ND            | ND          | 58.87       | ND          | ND          | ND          |
| HOU         | 10      | ND               | 13.05        | ND          | ND            | 224.91      | ND              | ND            | ND          | 1728.62     | 6.26        | ND          | ND          |
| HUD         | 11      | 80.02            | 1830.26      | 860.62      | ND            | 1080.87     | 70.89           | 44.57         | 62.45       | 582.95      | 23.59       | ND          | 12.34       |
| INT         | 12      | ND               | ND           | ND          | ND            | 82.93       | ND              | ND            | ND          | 55.32       | ND          | ND          | ND          |
| LGL         | 13      | ND               | ND           | ND          | ND            | 106.00      | ND              | ND            | ND          | 144.81      | ND          | ND          | ND          |
| LIM         | 14      | ND               | ND           | ND          | ND            | ND          | ND              | ND            | ND          | ND          | ND          | ND          | ND          |
| LRO         | 15      | ND               | ND           | ND          | ND            | ND          | ND              | ND            | ND          | 127.33      | ND          | ND          | ND          |
| MAN         | 16      | ND               | ND           | ND          | ND            | 21.00       | ND              | ND            | ND          | 29.29       | ND          | ND          | ND          |
| MAR         | 17      | ND               | ND           | ND          | ND            | 97.39       | ND              | ND            | ND          | 102.54      | ND          | ND          | ND          |
| NEP         | 18      | ND               | ND           | ND          | ND            | 9.50        | ND              | ND            | ND          | 21.92       | ND          | ND          | ND          |
| ORE         | 19      | ND               | 5.99         | ND          | ND            | ND          | ND              | ND            | ND          | 4.74        | ND          | ND          | ND          |
| PLA         | 21      | ND               | ND           | ND          | ND            | 23.29       | ND              | ND            | ND          | 39.49       | ND          | ND          | ND          |
| PON         | 22      | ND               | 126.34       | 29.58       | ND            | 116.14      | ND              | ND            | ND          | 121.04      | ND          | ND          | ND          |
| POS         | 23      | ND               | ND           | ND          | ND            | ND          | ND              | ND            | ND          | ND          | ND          | ND          | ND          |
| ROU         | 24      | ND               | ND           | ND          | ND            | ND          | ND              | ND            | ND          | ND          | ND          | ND          | ND          |
| SAN         | 25      | ND               | 71.97        | 96.93       | ND            | 474.18      | 22.61           | 21.42         | ND          | 62.83       | ND          | ND          | ND          |
| SIL         | 26      | ND               | ND           | ND          | ND            | 135.22      | ND              | ND            | ND          | 277.14      | ND          | ND          | ND          |
| STC         | 27      | ND               | ND           | ND          | ND            | ND          | ND              | ND            | ND          | ND          | ND          | ND          | ND          |
| STO         | 28      | ND               | ND           | ND          | ND            | 12.36       | ND              | ND            | ND          | 11.91       | ND          | ND          | ND          |
| WIX         | 30      | 35.53            | 449.39       | 620.93      | ND            | 3569.73     | 102.48          | 112.62        | 26.26       | 79.92       | ND          | ND          | ND          |
| WTL         | 31      | ND               | ND           | ND          | ND            | 12.31       | ND              | ND            | ND          | 11.78       | ND          | ND          | ND          |

\* BDL = Below Detection Limit; \* ND = Not Detected.

Table S5. September 2017 LC/MS/MS data.

| September 2017 |         |                  |              |             |               |             |                  |               |             |             |             |             |             |
|----------------|---------|------------------|--------------|-------------|---------------|-------------|------------------|---------------|-------------|-------------|-------------|-------------|-------------|
| Sample Name    | Site ID | D-Asp3- RR (ppt) | MC- RR (ppt) | MC-YR (ppt) | MC-HtyR (ppt) | MC-LR (ppt) | D-Asp3- LR (ppt) | MC-HilR (ppt) | MC-WR (ppt) | MC-LA (ppt) | MC-LY (ppt) | MC-LW (ppt) | MC-LF (ppt) |
| BEA            | 1       | ND               | ND           | ND          | ND            | 5.32        | ND               | ND            | ND          | 7.31        | ND          | ND          | ND          |
| BEL            | 2       | ND               | 127.04       | 36.24       | ND            | 79.41       | 5.65             | BDL           | 4.24        | BDL         | ND          | ND          | ND          |
| BOG            | 3       | ND               | ND           | ND          | ND            | 8.42        | BDL              | ND            | ND          | 149.88      | ND          | ND          | ND          |
| BRI            | 4       | ND               | 306.23       | ND          | ND            | 72.61       | 263.38           | ND            | 4.75        | ND          | ND          | ND          | ND          |
| CAD            | 5       | 45.40            | 1323.79      | 179.07      | 29.86         | 348.09      | 5.50             | 17.02         | 29.49       | 67.22       | ND          | ND          | ND          |
| COL            | 6       | ND               | ND           | ND          | ND            | 10.67       | ND               | ND            | ND          | 5.32        | ND          | ND          | ND          |
| DEE            | 7       | ND               | ND           | ND          | ND            | 69.41       | ND               | ND            | ND          | 106.66      | ND          | ND          | ND          |
| ERI            | 8       | ND               | ND           | ND          | ND            | 81.67       | ND               | ND            | ND          | 109.84      | ND          | 42.55       | ND          |
| FOR            | 9       | 14.85            | 1136.22      | 406.86      | ND            | 695.23      | 15.93            | 18.87         | 35.19       | 326.11      | BDL         | ND          | ND          |
| HOU            | 10      | ND               | ND           | ND          | ND            | 12.34       | ND               | ND            | ND          | 98.77       | ND          | ND          | ND          |
| HUD            | 11      | ND               | 40.32        | ND          | ND            | 26.19       | 89.57            | ND            | ND          | 9.61        | ND          | ND          | ND          |
| INT            | 12      | ND               | ND           | ND          | ND            | 18.38       | ND               | ND            | ND          | 33.93       | ND          | ND          | ND          |
| LGL            | 13      | ND               | ND           | ND          | ND            | 124.70      | BDL              | ND            | ND          | 111.88      | ND          | ND          | ND          |
| LIM            | 14      | ND               | ND           | ND          | ND            | ND          | ND               | ND            | ND          | ND          | ND          | ND          | ND          |
| LRO            | 15      | ND               | ND           | ND          | ND            | ND          | ND               | ND            | ND          | 18.38       | ND          | ND          | ND          |
| MAN            | 16      | ND               | ND           | ND          | ND            | 87.22       | ND               | ND            | ND          | 851.64      | ND          | ND          | ND          |
| MAR            | 17      | ND               | ND           | ND          | ND            | 42.40       | ND               | ND            | ND          | 68.49       | ND          | ND          | ND          |
| NEP            | 18      | ND               | 3.05         | 13.48       | ND            | 85.27       | BDL              | ND            | ND          | 148.78      | ND          | ND          | ND          |
| ORE            | 19      | ND               | 32.89        | ND          | ND            | 22.89       | 34.43            | ND            | ND          | 6.18        | ND          | ND          | ND          |
| PAR            | 20      | ND               | ND           | ND          | ND            | 88.93       | ND               | 4.34          | ND          | 263.36      | ND          | ND          | ND          |
| PLA            | 21      | ND               | ND           | ND          | ND            | 19.70       | ND               | ND            | ND          | 22.00       | ND          | ND          | ND          |
| PON            | 22      | ND               | 353.91       | 56.71       | 4.37          | 255.87      | ND               | 6.41          | 4.59        | 106.74      | ND          | ND          | ND          |
| POS            | 23      | ND               | ND           | 3.49        | ND            | 9.69        | ND               | ND            | ND          | 7.94        | ND          | ND          | ND          |
| ROU            | 24      | ND               | ND           | ND          | ND            | ND          | ND               | ND            | ND          | ND          | ND          | ND          | ND          |
| SAN            | 25      | ND               | 71.57        | 49.74       | ND            | 561.48      | 6.40             | 12.91         | ND          | 61.79       | ND          | ND          | ND          |
| SIL            | 26      | ND               | ND           | ND          | ND            | 101.64      | ND               | ND            | ND          | 168.65      | ND          | ND          | ND          |
| STC            | 27      | ND               | ND           | ND          | ND            | 15.86       | ND               | ND            | ND          | 38.90       | ND          | ND          | ND          |
| STO            | 28      | ND               | ND           | ND          | ND            | BDL         | ND               | ND            | ND          | ND          | ND          | ND          | ND          |
| SUP            | 29      | ND               | ND           | ND          | ND            | BDL         | ND               | ND            | ND          | BDL         | ND          | ND          | ND          |
| WIX            | 30      | ND               | ND           | ND          | ND            | 9.16        | ND               | ND            | ND          | ND          | ND          | ND          | ND          |
| WTL            | 31      | ND               | ND           | ND          | ND            | 15.12       | ND               | ND            | ND          | 42.98       | ND          | ND          | ND          |

\* BDL = Below Detection Limit; \* ND = Not Detected.

Table S6. October 2017 LC/MS/MS data.

|             |         | October 2017     |              |             |               |             |                 |               |             |             |             |             |             |
|-------------|---------|------------------|--------------|-------------|---------------|-------------|-----------------|---------------|-------------|-------------|-------------|-------------|-------------|
| Sample Name | Site ID | D-Asp3- RR (ppt) | MC- RR (ppt) | MC-YR (ppt) | MC-HtyR (ppt) | MC-LR (ppt) | D-Asp3-LR (ppt) | MC-HilR (ppt) | MC-WR (ppt) | MC-LA (ppt) | MC-LY (ppt) | MC-LW (ppt) | MC-LF (ppt) |
| BEA         | 1       | ND               | ND           | ND          | ND            | 2.45        | ND              | ND            | ND          | ND          | ND          | ND          | ND          |
| BEL         | 2       | ND               | 1506.29      | 457.57      | ND            | 869.37      | 57.91           | 31.74         | 32.00       | 51.19       | 10.75       | ND          | ND          |
| BOG         | 3       | ND               | ND           | ND          | ND            | ND          | 20.14           | ND            | ND          | 9.73        | ND          | ND          | ND          |
| BRI         | 4       | ND               | 847.98       | 84.85       | ND            | 186.22      | 181.97          | BDL           | 13.15       | ND          | ND          | ND          | ND          |
| CAD         | 5       | ND               | 1193.36      | 194.64      | 22.22         | 276.62      | 21.78           | 22.60         | 21.81       | 58.58       | ND          | ND          | ND          |
| COL         | 6       | ND               | ND           | ND          | ND            | 14.62       | ND              | ND            | ND          | ND          | ND          | ND          | ND          |
| DEE         | 7       | ND               | ND           | ND          | ND            | 47.51       | ND              | ND            | ND          | 129.90      | ND          | ND          | ND          |
| ERI         | 8       | ND               | ND           | ND          | ND            | ND          | ND              | ND            | ND          | ND          | ND          | ND          | ND          |
| FOR         | 9       | ND               | 128.78       | 66.21       | ND            | 132.95      | 9.80            | ND            | ND          | ND          | ND          | ND          | ND          |
| HOU         | 10      | ND               | ND           | ND          | ND            | 16.23       | ND              | ND            | ND          | 66.97       | ND          | ND          | ND          |
| HUD         | 11      | ND               | 33.38        | ND          | ND            | 13.60       | ND              | ND            | ND          | ND          | ND          | ND          | ND          |
| INT         | 12      | ND               | ND           | ND          | ND            | 22.00       | ND              | ND            | ND          | 23.02       | ND          | ND          | ND          |
| LGL         | 13      | ND               | ND           | ND          | ND            | 103.34      | ND              | ND            | ND          | 114.63      | ND          | ND          | ND          |
| LIM         | 14      | ND               | ND           | ND          | ND            | ND          | ND              | ND            | ND          | ND          | ND          | ND          | ND          |
| LRO         | 15      | ND               | ND           | ND          | ND            | ND          | ND              | ND            | ND          | 8.84        | ND          | ND          | ND          |
| MAN         | 16      | ND               | ND           | ND          | ND            | ND          | ND              | ND            | ND          | 307.52      | ND          | ND          | ND          |
| MAR         | 17      | ND               | ND           | ND          | ND            | 25.07       | ND              | ND            | ND          | 91.59       | ND          | ND          | ND          |
| NEP         | 18      | ND               | ND           | ND          | ND            | 45.97       | ND              | ND            | ND          | 88.89       | ND          | ND          | ND          |
| ORE         | 19      | ND               | 5.95         | ND          | ND            | 39.49       | 27.04           | ND            | ND          | ND          | ND          | ND          | ND          |
| PAR         | 20      | ND               | ND           | ND          | ND            | 74.22       | ND              | ND            | ND          | 279.78      | ND          | ND          | ND          |
| PLA         | 21      | ND               | ND           | ND          | ND            | 19.33       | ND              | ND            | ND          | 12.56       | ND          | ND          | ND          |
| PON         | 22      | ND               | 474.05       | 134.73      | ND            | 257.35      | 15.20           | BDL           | 11.89       | 103.99      | ND          | ND          | ND          |
| POS         | 23      | ND               | ND           | ND          | ND            | ND          | ND              | ND            | ND          | ND          | ND          | ND          | ND          |
| ROU         | 24      | ND               | ND           | ND          | ND            | ND          | ND              | ND            | ND          | ND          | ND          | ND          | ND          |
| SAN         | 25      | ND               | ND           | ND          | ND            | 13.36       | ND              | ND            | ND          | ND          | ND          | ND          | ND          |
| SIL         | 26      | ND               | ND           | ND          | ND            | 36.47       | ND              | ND            | ND          | 211.62      | ND          | ND          | ND          |
| STC         | 27      | ND               | ND           | ND          | ND            | 25.68       | ND              | ND            | ND          | 29.25       | ND          | ND          | ND          |
| STO         | 28      | ND               | ND           | ND          | ND            | ND          | ND              | ND            | ND          | ND          | ND          | ND          | ND          |
| SUP         | 29      | ND               | ND           | ND          | ND            | ND          | ND              | ND            | ND          | ND          | ND          | ND          | ND          |
| WIX         | 30      | ND               | ND           | ND          | ND            | 13.29       | ND              | ND            | ND          | ND          | ND          | ND          | ND          |
| WTL         | 31      | ND               | ND           | ND          | ND            | 8.67        | ND              | ND            | ND          | ND          | ND          | ND          | ND          |

\* BDL = Below Detection Limit; \* ND = Not Detected.

Table S7. Adda-ELISA data.

| July        |         |                      | August      |         |                      | September   |         |                      | October     |         |                      |
|-------------|---------|----------------------|-------------|---------|----------------------|-------------|---------|----------------------|-------------|---------|----------------------|
| Sample Name | Site ID | Total MC-LR Eq.(ppb) | Sample Name | Site ID | Total MC-LR Eq.(ppb) | Sample Name | Site ID | Total MC-LR Eq.(ppb) | Sample Name | Site ID | Total MC-LR Eq.(ppb) |
| BEA         | 1       | 0.05                 | BEA         | 1       | 0.04                 | BEA         | 1       | BD                   | BEA         | 1       | BD                   |
| BEL         | 2       | 0.10                 | BEL         | 2       | 0.11                 | BEL         | 2       | 0.39                 | BEL         | 2       | 4.83                 |
| BOG         | 3       | 0.11                 | BOG         | 3       | 0.04                 | BOG         | 3       | 0.22                 | BOG         | 3       | 0.20                 |
| BRI         | 4       | 0.42                 | BRI         | 4       | 15.32                | BRI         | 4       | 3.30                 | BRI         | 4       | 3.13                 |
| CAD         | 5       | 1.18                 | CAD         | 5       | 2.15                 | CAD         | 5       | 2.50                 | CAD         | 5       | 3.92                 |
| COL         | 6       | 0.02                 | COL         | 6       | 0.02                 | COL         | 6       | BD                   | COL         | 6       | BD                   |
| DEE         | 7       | 0.81                 | DEE         | 7       | 1.88                 | DEE         | 7       | 0.32                 | DEE         | 7       | 0.72                 |
| ERI         | 8       | 0.01                 | ERI         | 8       | 0.09                 | ERI         | 8       | 0.17                 | ERI         | 8       | 0.22                 |
| FOR         | 9       | 0.14                 | FOR         | 9       | 0.34                 | FOR         | 9       | 4.75                 | FOR         | 9       | 0.98                 |
| HOU         | 10      | 1.17                 | HOU         | 10      | 0.16                 | HOU         | 10      | 0.17                 | HOU         | 10      | 0.35                 |
| HUD         | 11      | 0.12                 | HUD         | 11      | 4.83                 | HUD         | 11      | 0.93                 | HUD         | 11      | 1.21                 |
| INT         | 12      | 0.11                 | INT         | 12      | 0.23                 | INT         | 12      | BD                   | INT         | 12      | 0.25                 |
| LGL         | 13      | 0.06                 | LGL         | 13      | 0.26                 | LGL         | 13      | BD                   | LGL         | 13      | 0.75                 |
| LIM         | 14      | 0.05                 | LIM         | 14      | 0.15                 | LIM         | 14      | 0.47                 | LIM         | 14      | 0.16                 |
| LRO         | 15      | 0.18                 | LRO         | 15      | 0.18                 | LRO         | 15      | BD                   | LRO         | 15      | 0.21                 |
| MAN         | 16      | 0.12                 | MAN         | 16      | 0.16                 | MAN         | 16      | 2.64                 | MAN         | 16      | 1.16                 |
| MAR         | 17      | 0.29                 | MAR         | 17      | 0.39                 | MAR         | 17      | BD                   | MAR         | 17      | 0.40                 |
| NEP         | 18      | 0.08                 | NEP         | 18      | 0.10                 | NEP         | 18      | 0.36                 | NEP         | 18      | 0.52                 |
| ORE         | 19      | 0.09                 | ORE         | 19      | 0.17                 | ORE         | 19      | 0.28                 | ORE         | 19      | 0.41                 |
| PAR         | 20      | 0.11                 | PAR         | 20      | >5                   | PAR         | 20      | BD                   | PAR         | 20      | 1.65                 |
| PLA         | 21      | 0.05                 | PLA         | 21      | 0.10                 | PLA         | 21      | BD                   | PLA         | 21      | 0.24                 |
| PON         | 22      | 2.30                 | PON         | 22      | 0.55                 | PON         | 22      | 1.28                 | PON         | 22      | 3.63                 |
| POS         | 23      | 0.10                 | POS         | 23      | 0.03                 | POS         | 23      | BD                   | POS         | 23      | 0.20                 |
| ROU         | 24      | 0.10                 | ROU         | 24      | 0.07                 | ROU         | 24      | BD                   | ROU         | 24      | BD                   |
| SAN         | 25      | 0.07                 | SAN         | 25      | 0.63                 | SAN         | 25      | 0.86                 | SAN         | 25      | 0.22                 |
| SIL         | 26      | 0.11                 | SIL         | 26      | 0.58                 | SIL         | 26      | 0.55                 | SIL         | 26      | 1.01                 |
| STC         | 27      | 0.05                 | STC         | 27      | 0.06                 | STC         | 27      | BD                   | STC         | 27      | 0.27                 |
| STO         | 28      | 0.09                 | STO         | 28      | 0.10                 | STO         | 28      | BD                   | STO         | 28      | BD                   |
| SUP         | 29      | 0.09                 | SUP         | 29      | X                    | SUP         | 29      | BD                   | SUP         | 29      | BD                   |
| WIX         | 30      | 0.05                 | WIX         | 30      | >5                   | WIX         | 30      | BD                   | WIX         | 30      | 0.21                 |
| WTL         | 31      | 0.05                 | WTL         | 31      | 0.07                 | WTL         | 31      | BD                   | WTL         | 31      | 0.19                 |
